# Supplementary material for: Impact of Scientific Versus Emotional Wording of Patient Questions on Doctor-Patient Communication in an Internet Forum: A Randomized Controlled Experiment with Medical Students
Source: PubMed Central journal article supplement (PMC4704952; doi:10.2196/jmir.4597), 2015-11-25
Supplement: jmir_v17i11e268_app1.pdf [file jmir_v17i11e268_app1.pdf]

**Multimedia Appendix 1.** List of scientific and emotional wordings in participants' reply posts.

| <b>Scientific keywords</b> | <b>Emotional keywords</b> |
|----------------------------|---------------------------|
| statistical                | to calm                   |
| likelihood                 | to please                 |
| percentage                 | to worry                  |
| study                      | fortunately               |
| to confirm                 | to encourage              |
| scientific                 | doubt                     |
| single case study          | anxiety                   |
| standardized               | concerns                  |
| evident                    | insecure                  |
| significant                | to feel                   |
| outcome                    | to unsettle               |
| normal population          | sorrow                    |
| to verify                  | courage                   |
| offering evidence          | unscrupulous              |
| statistic                  | fears                     |
| proven                     | insecurity                |
| standard                   | feeling                   |
| verifiable                 | worried                   |
| to prove                   |                           |
